# Supplementary material for: Lactam-mediated synthesis of inorganic nanoparticles and size/surface-dependent properties: a case study on zinc oxide
Source: Royal Society of Chemistry journal article supplement (doi:10.1039/c3ra41071d), 2013-01-01
Supplement: c3ra41071d.pdf [file c3ra41071d.pdf]

**Electronic Supplementary Information (ESI) for**  
**Lactam-Mediated Synthesis of Inorganic Nanoparticles and Their**  
**Size-Dependent Properties: A Case Study on Zinc Oxide**

Housheng Xia,<sup>1</sup> Guisheng Yang,<sup>\* 1 2</sup>

<sup>1</sup> Department of Polymer Science and Engineering, Zhejiang University, 38 Zheda Road, Hangzhou 31027, People's Republic of  
China

<sup>2</sup> Shanghai Genius Advanced Materials Co. Ltd., Shanghai, 201109, People's Republic of China

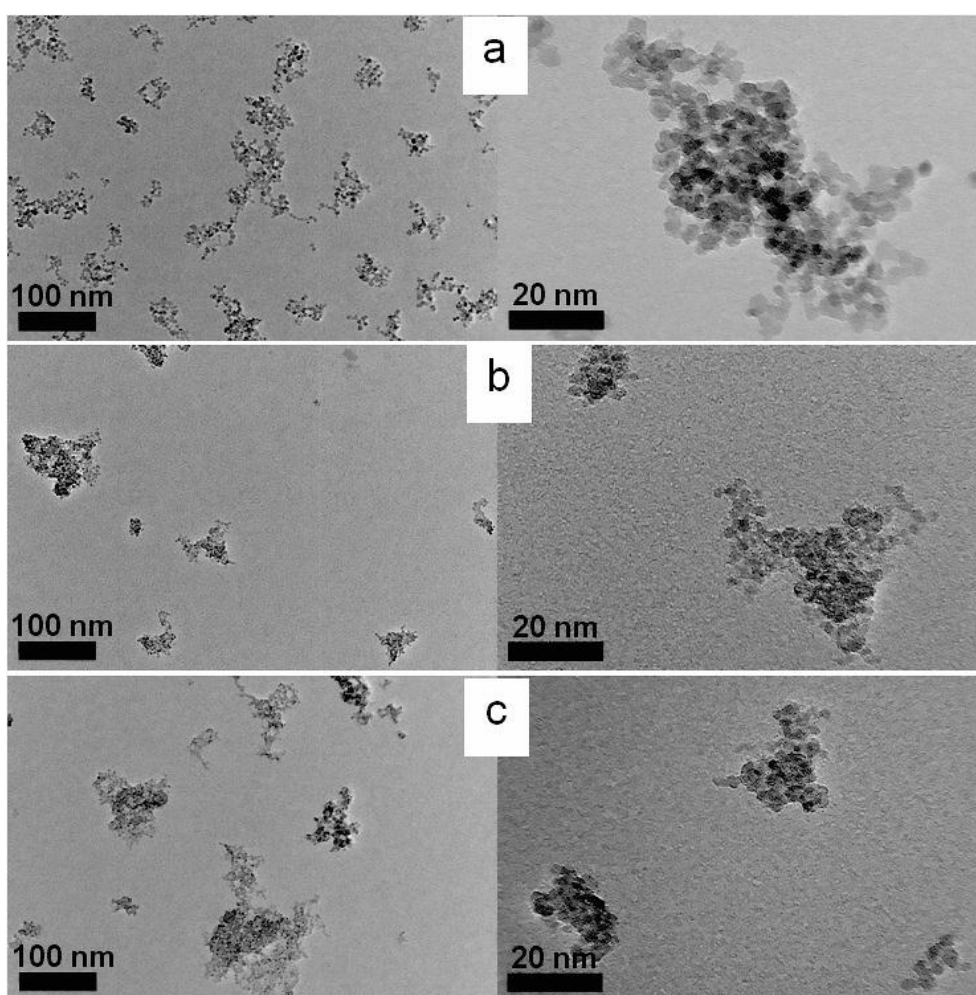

**Figure S1.** Low (left) and high (right) magnified TEM images of Fe<sub>3</sub>O<sub>4</sub> NPs synthesized in a)  $\gamma$ -butyrolactam, b)  $\delta$ -valerolactam and c)  $\epsilon$ -caprolactam.

---

\* Correspondence to: G. Yang (ygs@geniuscn.com).

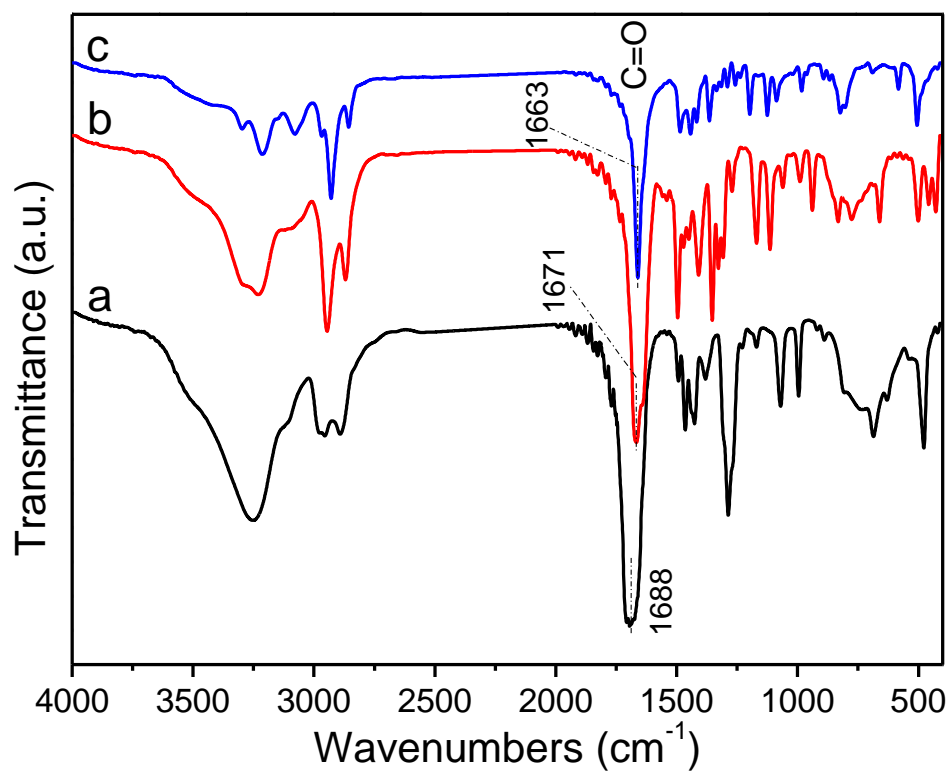

**Figure S2.** FT-IR spectra of pure lactams: a)  $\gamma$ -butyrolactam, b)  $\delta$ -valerolactam and c)  $\epsilon$ -caprolactam.

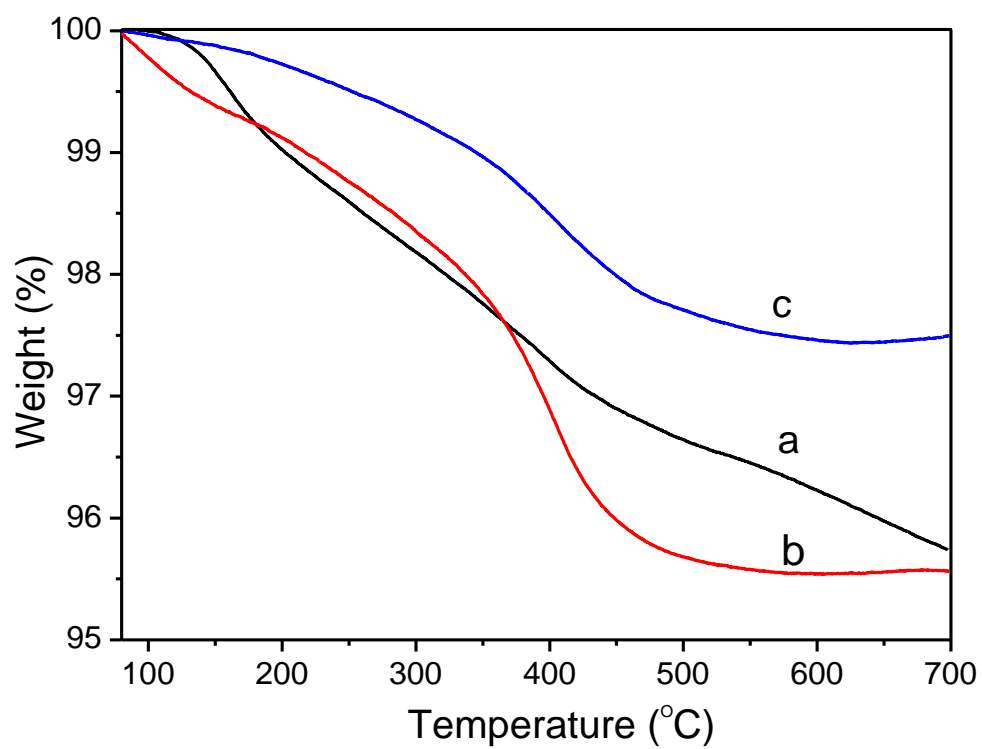

**Figure S3.** TGA curves of a) ZnO-BL, b) ZnO-VL and c) ZnO-CL NPs.
